## 1 Main manuscript for

### 4 *Mycobacterium tuberculosis* DosS binds H<sub>2</sub>S through its Fe<sup>3+</sup> heme iron to regulate the Dos 5 dormancy regulon

7 Ritesh R. Sevalkar<sup>a</sup>, Joel N. Glasgow<sup>a,1</sup>, Martín Pettinati<sup>b,c</sup>, Marcelo A. Marti<sup>d,e</sup>, Vineel P. Reddy<sup>a</sup>,  
8 Swati Basu<sup>f</sup>, Elmira Alipour<sup>f</sup>, Daniel B. Kim-Shapiro<sup>f</sup>, Dario A. Estrin<sup>b,c</sup>, Jack R. Lancaster, Jr<sup>g</sup> and  
9 Adrie J.C. Steyn<sup>a,h,1</sup>

11 <sup>a</sup>Department of Microbiology, and Centers for AIDS Research and Free Radical Biology, University  
12 of Alabama at Birmingham, Birmingham, AL

13 <sup>b</sup>Universidad de Buenos Aires, Facultad de Ciencias Exactas y Naturales, Departamento de  
14 Química Inorgánica, Analítica y Química Física, Buenos Aires, Argentina

15 <sup>c</sup>CONICET-Universidad de Buenos Aires, Instituto de Química Física de los Materiales, Medio  
16 Ambiente y Energía (INQUIMAE), Buenos Aires, Argentina

17 <sup>d</sup>Universidad de Buenos Aires, Facultad de Ciencias Exactas y Naturales, Departamento de  
18 Química Biológica, Buenos Aires, Argentina

19 <sup>e</sup>CONICET-Universidad de Buenos Aires, Instituto de Química Biológica (IQUIBICEN), Buenos  
20 Aires, Argentina

21 <sup>f</sup>Department of Physics, Wake Forest University, Winston-Salem, NC

22 <sup>g</sup>Department of Pharmacology & Chemical Biology, Vascular Medicine Institute, University of  
23 Pittsburgh School of Medicine, Pittsburgh, PA

24 <sup>h</sup>Africa Health Research Institute, University of KwaZulu-Natal, Durban, South Africa

#### 26 <sup>1</sup>Corresponding authors:

27 Adrie J.C. Steyn, PhD  
28 Professor, University of Alabama at Birmingham  
29 Investigator, Africa Health Research Institute  
30 **Email:** [asteyn@uab.edu](mailto:asteyn@uab.edu) or [adrie.steyn@ahri.org](mailto:adrie.steyn@ahri.org)

31  
32 Joel N. Glasgow, PhD  
33 Assistant Professor, University of Alabama at Birmingham  
34 **Email:** [jng@uab.edu](mailto:jng@uab.edu)

35  
36 **Author Contributions:** Conceptualization and Design: RRS, JRL and AJCS. Execution: UV-Vis  
37 studies and biochemical assays (RRS), EPR studies (SB, EA and DBKS), MD modeling (MP, MM,  
38 DE), *in vitro* macrophage assays (RRS, VPR). Data analysis: RRS, JRL, JNG, VPR, DBKS, MM,  
39 DE and AJCS. Technical expertise: JRL, DBSK, MP, MM, DE. Writing: RRS, JNG and AJCS wrote  
40 the manuscript. Editing: JRL, JNG, DE and AJCS. Figure preparation: RRS. All authors discussed  
41 the results and commented on the manuscript.

42  
43 **Competing Interest Statement:** The authors declare no conflicts of interest.

44  
45 **Classification:** Major-Biological Sciences, Minor-Biochemistry

46  
47 **Keywords:** hydrogen sulfide, tuberculosis, dormancy regulon, two-component system, DosS

48  
49 **This PDF file includes:** Main text and Figures 1-7

50 **Abstract**

51 *Mycobacterium tuberculosis* (*Mtb*) senses and responds to host-derived gasotransmitters NO and  
52 CO via heme-containing sensor kinases DosS and DosT and the response regulator DosR.  
53 Hydrogen sulfide (H<sub>2</sub>S) is an important signaling molecule in mammals, but its role in *Mtb*  
54 physiology is unclear. We have previously shown that exogenous H<sub>2</sub>S can modulate expression  
55 of genes in the Dos dormancy regulon via an unknown mechanism(s). Here, we tested the  
56 hypothesis that *Mtb* senses and responds to H<sub>2</sub>S via the DosS/T/R system. Using UV-Vis and EPR  
57 spectroscopy, we show that H<sub>2</sub>S binds directly to the ferric (Fe<sup>3+</sup>) heme of DosS (K<sub>D</sub> = 5.64 μM) but  
58 not the ferrous (Fe<sup>2+</sup>) form. No interaction with DosT was detected. Thus, the mechanism by which  
59 DosS senses H<sub>2</sub>S is different from that for sensing NO and CO, which bind only the ferrous forms  
60 of DosS and DosT. Steered Molecular Dynamics simulations show that H<sub>2</sub>S, and not the charged  
61 HS<sup>-</sup> species, can enter the DosS heme pocket. We also show that H<sub>2</sub>S increases DosS autokinase  
62 activity and subsequent phosphorylation of DosR, and H<sub>2</sub>S-mediated increases in Dos regulon  
63 gene expression is lost in *Mtb* lacking DosS. Finally, we demonstrate that physiological levels of  
64 H<sub>2</sub>S in macrophages can induce Dos regulon genes via DosS. Overall, these data reveal a novel  
65 mechanism whereby *Mtb* senses and responds to a third host gasotransmitter, H<sub>2</sub>S, via DosS-Fe<sup>3+</sup>.  
66 These findings highlight the remarkable plasticity of DosS and establish a new paradigm for how  
67 bacteria can sense multiple gasotransmitters through a single heme sensor kinase.

68

69 **Significance Statement**

70 Hydrogen sulfide (H<sub>2</sub>S) is an important signaling molecule in eukaryotes and bacteria, and along  
71 with CO and NO, is an important part of host defense against *Mycobacterium tuberculosis* (*Mtb*).  
72 However, the mechanism(s) by which *Mtb* senses and responds to H<sub>2</sub>S is unknown. Here, we  
73 report that the *Mtb* heme sensor kinase DosS, a known sensor of CO and NO, is also a sensor of  
74 H<sub>2</sub>S. We found that H<sub>2</sub>S binds DosS in its ferric (Fe<sup>3+</sup>) state, which is considered as its inactive  
75 state, to induce the Dos dormancy regulon during infection. These data highlight the unusual  
76 capacity of *Mtb* to sense multiple gasotransmitters through a single sensing protein.

77 **Main Text**

78

79 **Introduction**

80 Tuberculosis (TB) is a global epidemic responsible for ~1.4 million deaths annually (1).  
81 *Mycobacterium tuberculosis* (*Mtb*), the causal agent of TB, can persist in a state of clinical latency  
82 for decades. *Mtb* survives and establishes an infection due, in part, to its ability to sense and  
83 respond to host defenses in the lung, including host-generated gasotransmitters. Carbon monoxide  
84 (CO) and nitric oxide (NO) are critical components of the host defense to clear the pathogen and  
85 are important to the outcome of *Mtb* infection (2, 3). The most recent addition to the list of  
86 gasotransmitters is hydrogen sulfide (H<sub>2</sub>S). Notably, enzymes required for the generation of NO,  
87 (nitric oxide synthase [iNOS]) (3), CO (heme oxygenase-1 [HO-1]) (2, 4, 5), and H<sub>2</sub>S (cystathionine  
88 β-synthase [CBS] (6), cystathionine γ-lyase [CSE] (6), and 3-mercaptopyruvate sulfur transferase  
89 [3-MPST]) (6), are upregulated in the lungs of *Mtb*-infected mice and human TB patients. The  
90 increased levels of these enzymes suggest an abundance of NO, CO, and H<sub>2</sub>S at the primary site  
91 of infection.

92 The role of NO and CO in TB pathogenesis is well studied compared to that of H<sub>2</sub>S. We  
93 have recently shown that *Mtb*-infected mice deficient in the H<sub>2</sub>S-producing enzyme CBS (6, 7) or  
94 CSE (6, 7) survive significantly longer with reduced organ burden, suggesting that host-generated  
95 H<sub>2</sub>S is beneficial for *Mtb in vivo*. Bacterial two-component regulatory systems sense changes in  
96 the host environment and mediate adaptive genetic responses. The *Mtb* genome encodes 11  
97 paired two-component systems (8), including the DosS/T-DosR system, comprised of heme-  
98 containing sensor kinases DosS and DosT and their cognate transcriptional response regulator  
99 DosR (9). DosS, currently regarded as a redox sensor, is considered inactive in the oxidized/met  
100 (Fe<sup>3+</sup>) state and is activated by direct binding of NO or CO to the heme iron in the reduced (Fe<sup>2+</sup>)  
101 state (10). DosT is an oxygen sensor and is inactive in its oxy-bound form which is activated upon  
102 loss of O<sub>2</sub> or direct binding of NO or CO to the heme iron in the reduced (Fe<sup>2+</sup>) state (10, 11) (Fig.  
103 1A).

104 We recently reported that exposure of *Mtb* to the H<sub>2</sub>S donor GYY4137 induces the  
105 expression of genes that regulate cysteine metabolism and genes in the copper and Dos dormancy  
106 regulons (7). While H<sub>2</sub>S can chemically modify biomolecules directly (12-14), we considered the  
107 possibility that alterations in gene expression in response to H<sub>2</sub>S are mediated by regulatory  
108 proteins in *Mtb*. Since H<sub>2</sub>S is known to bind the iron in heme-containing proteins (15-19), and  
109 because DosS was among the Dos regulon genes induced upon exposure to H<sub>2</sub>S (7), we  
110 hypothesize that DosS and/or DosT sense and respond to H<sub>2</sub>S to induce the Dos dormancy  
111 regulon. To examine the interaction of H<sub>2</sub>S with DosS and DosT, we used UV-visible and EPR  
112 spectroscopy. We also examined how H<sub>2</sub>S modulates DosS autokinase and phosphate transfer,  
113 and *Mtb* gene expression *in vitro*. Lastly, we examined how *Mtb* senses H<sub>2</sub>S during macrophage

114 infection. We expect that the findings in this work will lead to an improved understanding of *Mtb*  
115 persistence.

116

## 117 **Results**

118

### 119 **DosS in the Fe<sup>3+</sup> form binds H<sub>2</sub>S**

120 DosS and DosT contain heme and exhibit specific absorption characteristics in the ultraviolet-  
121 visible (UV-Vis) range, which are altered upon interaction between the heme iron and ligands like  
122 NO and CO (10, 20). To determine whether *Mtb* DosS or DosT sense H<sub>2</sub>S via its heme iron, we  
123 monitored spectral changes of the ferric (Fe<sup>3+</sup>) and ferrous (Fe<sup>2+</sup>) forms of recombinant DosS and  
124 DosT in the presence of sulfide (here, we define sulfide as H<sub>2</sub>S and HS<sup>-</sup>) following addition of  
125 sodium sulfide (Na<sub>2</sub>S). Addition of sulfide red shifts the Soret peak of the Fe<sup>3+</sup> form of DosS from  
126 408 nm to 415 nm, indicative of a high-spin to low-spin transition (21), with increased peak  
127 intensities of the α (570 nm) and β (535 nm) bands (Fig. 1B), similar to spectral changes observed  
128 upon sulfide binding in other heme-containing proteins (Table 1). Reduction of DosS to the Fe<sup>2+</sup>  
129 form using sodium dithionite (DTH) shifts the Soret peak to ~425 nm with emergence of a new peak  
130 at 560 nm, as observed previously (10, 22). However, the absorption pattern of DTH-reduced DosS  
131 remains unchanged in the presence of sulfide. Similarly, addition of sulfide does not alter the  
132 absorption spectrum of DosT, where the heme iron remains in the oxy-bound state (Fe<sup>2+</sup>-O<sub>2</sub>) (Fig.  
133 1C) (10, 22). These data suggest that sulfide directly interacts with the Fe<sup>3+</sup> form of DosS. This is  
134 mechanistically distinct from the binding of NO and CO, which bind the heme iron of DosS and  
135 DosT in the Fe<sup>2+</sup> state.

136 H<sub>2</sub>S is in protonation equilibrium with HS<sup>-</sup> in solution with a pK<sub>a</sub> value of 7.01 (23). To  
137 determine whether H<sub>2</sub>S or anionic hydrosulfide (HS<sup>-</sup>) binds to the Fe<sup>3+</sup> form of DosS, we monitored  
138 the UV-Vis spectra of DosS at pH values above and below the pK<sub>a</sub> of H<sub>2</sub>S in the presence of 25  
139 μM Na<sub>2</sub>S. Notably, as the pH decreased we observed lower peak intensities in the 405 nm range,  
140 indicating reduced levels of unbound DosS, and increases in the ~420 nm range corresponding to  
141 sulfide-bound DosS. These data suggest that H<sub>2</sub>S, and not HS<sup>-</sup>, is the sulfide species that initially  
142 binds to the heme iron of DosS (Fig. 1D).

143 Iron is paramagnetic in its Fe<sup>3+</sup> state. Ligand binding to the heme iron results in  
144 perturbations in the *d*-orbitals that can be monitored by electron paramagnetic resonance (EPR)  
145 spectroscopy (10, 24). To confirm that H<sub>2</sub>S binds directly to the Fe<sup>3+</sup> form of DosS, we compared  
146 the EPR spectra of DosS before and after exposure to sulfide. DosS alone gives a strong axial  
147 feature centered at g=5.98, which is indicative of Fe<sup>3+</sup> in the high-spin (S=5/2) state (Fig. 1E) (10,  
148 25) (Table 1). The addition of increasing concentrations of sulfide results in the conversion of the  
149 g=5.98 high-spin signal into a rhombic low-spin signal with g values of 2.67, 2.26, and 1.76 (Fig. 1  
150 F-H), which are similar to low-spin sulfide-bound species reported for other heme-containing

151 proteins (Table 1). Taken together, these results indicate that H<sub>2</sub>S is a ligand of the Fe<sup>3+</sup> form of  
152 DosS and binding of H<sub>2</sub>S converts the Fe<sup>3+</sup> heme iron from the high-spin state to low-spin state.

153

#### 154 **Molecular dynamics simulations show that H<sub>2</sub>S, but not HS<sup>-</sup>, enters the DosS heme pocket**

155 The DosS heme group is buried within a hydrophobic pocket that is enclosed within the N-terminal  
156 GAF-A domain (22, 26). Access to the hydrophobic heme pocket is limited, and ligand entry is  
157 influenced by the adjacent amino acid side chains (22). Steered Molecular Dynamics (sMD) has  
158 been used to estimate association free energy required for H<sub>2</sub>S and HS<sup>-</sup> to access the heme iron  
159 in *L. Pectinata* met-hemoglobin (27) and met-myoglobin (27, 28). Similarly, our sMD simulations  
160 estimate the free energy barriers for access to the DosS heme iron to be approximately 5.6 kcal/mol  
161 for H<sub>2</sub>S and 16.7 kcal/mol for HS<sup>-</sup> (Fig. 2A). The much higher free energy barrier for HS<sup>-</sup> indicates  
162 that the uncharged H<sub>2</sub>S species is strongly favored to enter the heme pocket.

163 Our sMD simulations predict that H<sub>2</sub>S accesses the heme iron by passing between Phe<sup>98</sup>  
164 and Leu<sup>114</sup> of the heme binding pocket (Fig. S1). These residues form a “gate” which when open  
165 allows H<sub>2</sub>S and a few water molecules into and out of the heme pocket. This is possible due to the  
166 neutral charge of H<sub>2</sub>S (Fig. S1 A-C, Movie S1). In contrast, our sMD simulations indicate that HS<sup>-</sup>  
167 carries a strongly-bound solvation sphere that pushes the Phe<sup>98</sup> and Leu<sup>114</sup> side chains away,  
168 resulting in a considerable number of water molecules entering the heme pocket and increasing  
169 solvation of the heme active site (Fig. S1 D-F, Movie S2). The process of HS<sup>-</sup> entry is energetically  
170 unfavorable, as indicated by a much higher predicted free energy barrier compared to H<sub>2</sub>S.  
171 Notably, this H<sub>2</sub>S entry “gate” is located away from the “water channel” identified by Cho, et. al., in  
172 the DosS GAF-A domain structure (22). Overall, our sMD modeling indicating more favorable heme  
173 access for H<sub>2</sub>S supports our UV-Vis data demonstrating increased binding of sulfide at lower pH  
174 (Fig. 1D).

175

#### 176 **Quantum mechanics simulations show that H<sub>2</sub>S deprotonates following heme iron binding**

177 Modeling studies of heme-containing proteins predict that H<sub>2</sub>S can deprotonate following binding  
178 to heme iron (27, 28). To characterize the heme-bound state of H<sub>2</sub>S in DosS, we employed  
179 combined quantum mechanics/molecular mechanics simulations with density functional theory  
180 calculations (QM[DFT]/MM). Table 2 shows the structural and electronic parameters of both H<sub>2</sub>S  
181 and HS<sup>-</sup> bound states of DosS. As expected, the ligand-bound states display a low-spin ground  
182 state. The structural analysis shows that HS<sup>-</sup> forms a tighter bond (a significantly smaller Fe-S  
183 distance, [d Fe-S = 2.17 Å]) due to a significant charge transfer (sigma donation). Further, the  
184 proximal Fe-His bond shows a slightly positive trans effect, displaying a slightly smaller distance  
185 compared to penta-coordinated heme (ca 2.12 Å) (29, 30). Interestingly, in the H<sub>2</sub>S-bound state,  
186 the two protons become asymmetric and a weakening of the S-H bond is observed (d Fe-S = 2.35  
187 Å). On this basis, we evaluated the possibility of deprotonation of Fe-bound H<sub>2</sub>S using hybrid

188 QM/MM simulations. Strikingly, a simulation duration of 1 picosecond (ps) was sufficient to observe  
189 deprotonation of Fe-bound H<sub>2</sub>S (Fig. 2B-D and Movie S3). The proton acceptor is a water molecule  
190 located opposite from the distal Tyr (i.e., close to the solvent-exposed heme edge) which  
191 subsequently transfers a proton to the heme propionate (Fig. 2D). The heme propionate is  
192 accessible to the solvent and can again be deprotonated or remain in a protonated state. Overall,  
193 these data strongly suggest that HS<sup>-</sup> is the tighter binding and predominant bound sulfur species.

194

### 195 **H<sub>2</sub>S does not reduce the heme iron in DosS and binds with low micromolar affinity**

196 H<sub>2</sub>S is known to reduce heme iron to the Fe<sup>2+</sup> state in proteins like myoglobin and hemoglobin (16).  
197 Since the Fe<sup>2+</sup> form of DosS is understood to be the active form of the kinase (10, 20), it is important  
198 to determine whether H<sub>2</sub>S binding reduces the DosS heme iron. Therefore, we monitored the UV-  
199 Vis spectrum of the Fe<sup>3+</sup> form of DosS in the presence of 200 μM Na<sub>2</sub>S over time. As shown in Fig.  
200 3A, addition of Na<sub>2</sub>S resulted in the expected shift in the Soret peak from 408 nm to 415 with  
201 increased peak intensity of the α (570 nm) and β (535 nm) bands. Notably, we observed no  
202 additional shift in the Soret peak to 425 nm nor the appearance of the peak at 560 nm, both of  
203 which are indicative of the reduced form of DosS (Fig. 1A). Over the course of the experiment we  
204 noted a decrease in overall absorbance, which is most likely due to the loss of the heme prosthetic  
205 group from DosS (31, 32). These results indicate that H<sub>2</sub>S binding does not readily alter the  
206 oxidation state of the DosS heme iron.

207 To determine the affinity of DosS for H<sub>2</sub>S, we next monitored changes in the absorbance  
208 spectrum of DosS in the Fe<sup>3+</sup> state over a wide range of Na<sub>2</sub>S concentrations (Fig. 3B). Using the  
209 maximum change in absorbance at ~408 nm, we generated a substrate saturation curve from which  
210 a K<sub>D</sub><sup>app</sup> value of 5.64 ± 0.27 μM was calculated for H<sub>2</sub>S binding to DosS (3B and Inset). Notably,  
211 this K<sub>D</sub><sup>app</sup> value is similar to the K<sub>D</sub><sup>app</sup> value of 7.0 ± 0.4 μM reported for the H<sub>2</sub>S-met hemoglobin  
212 complex (15, 18). In summary, these results show that measureable, direct binding of H<sub>2</sub>S to DosS  
213 (Fe<sup>3+</sup>) does not reduce DosS to the active Fe<sup>2+</sup> form.

214

### 215 **H<sub>2</sub>S increases DosS autokinase activity and DosR phosphorylation**

216 To address the question of whether H<sub>2</sub>S binding can alter DosS kinase activity, we performed  
217 kinase assays using γ-<sup>32</sup>P-labeled ATP and recombinant DosS. We determined relative autokinase  
218 activities of DosS (Fe<sup>2+</sup>), DosS (Fe<sup>3+</sup>), and DosS (Fe<sup>3+</sup>-HS<sup>-</sup>) at 5-60 minutes following addition of  
219 γ-<sup>32</sup>P labeled ATP. Compared to the Fe<sup>3+</sup> form of DosS, which is considered the least active form  
220 (10), the Fe<sup>3+</sup>-HS<sup>-</sup> form of DosS exhibited increased autokinase activity. In these assays, the Fe<sup>2+</sup>  
221 form of DosS showed the highest autokinase activity (Fig 4A). Densitometric analysis of autokinase  
222 radiograms shows that the activity of the Fe<sup>3+</sup>-HS<sup>-</sup> form of DosS is increased by an average of  
223 ~30% at all time points compared to unbound DosS in the (Fe<sup>3+</sup>) form (Fig. 4B).

224           Next, we sought to determine whether the H<sub>2</sub>S-mediated increase in DosS autokinase  
225 activity results in augmented phosphorylation of DosR, the cognate response regulator of DosS.  
226 First, to standardize our transphosphorylation assays, unphosphorylated recombinant DosR was  
227 added to reaction buffer containing  $\gamma$ -<sup>32</sup>P-labeled DosS. Surprisingly, the phosphorylation of DosR  
228 by labeled DosS was extremely rapid, and was completed within seconds (Fig. S2). Therefore, to  
229 observe differences in the rates of phosphate transfer of DosS (Fe<sup>2+</sup>), DosS (Fe<sup>3+</sup>), and DosS (Fe<sup>3+</sup>-  
230 HS<sup>-</sup>), unphosphorylated DosS and DosR were added to the reaction buffer prior to the addition of  
231  $\gamma$ -<sup>32</sup>P-labeled ATP. Under these conditions, we observed increased phosphorylation of DosR in  
232 the presence of DosS (Fe<sup>3+</sup>-HS<sup>-</sup>) compared to DosR phosphorylation in the presence of DosS (Fe<sup>3+</sup>)  
233 at all time points measured. Maximum phosphorylation of DosR was observed in the presence of  
234 DosS (Fe<sup>2+</sup>) (Fig. 4C). Densitometric analysis of transphosphorylation radiograms shows an ~2-  
235 fold increase in labeled DosR in the presence of DosS (Fe<sup>3+</sup>-HS<sup>-</sup>) compared to the Fe<sup>3+</sup> form of  
236 DosS (Fig. 4D). Overall, these data indicate that the binding of sulfide to DosS increases its  
237 autokinase activity. Given the extremely rapid transfer of phosphate from DosS to DosR, we  
238 conclude that increased DosR phosphorylation is attributable primarily to changes in autokinase  
239 activity.

240           Our findings that sulfide binding increases autokinase activity and that HS<sup>-</sup> is likely the  
241 predominant bound ligand have implications for the structural basis of kinase domain activation.  
242 To elucidate a mechanism by which sulfide binding increases DosS autokinase activity, we  
243 employed MD modeling to detect structural differences between DosS in the Fe<sup>3+</sup> and Fe<sup>3+</sup>-HS<sup>-</sup>  
244 forms. Our analysis indicates that the hydrogen bonding network distal to the heme is significantly  
245 different between the ferric high spin (off-state) and the Fe<sup>3+</sup>-HS<sup>-</sup> low spin state (Fig. 5), but not the  
246 Fe<sup>3+</sup>-H<sub>2</sub>S state. In the Fe<sup>3+</sup> state of DosS, there is a loosely coordinated water molecule which  
247 cannot act as a hydrogen bond acceptor for Tyr<sup>171</sup>. Therefore the hydroxyl group of Tyr<sup>171</sup> rotates  
248 upward and instead forms a tight hydrogen bond with Glu<sup>87</sup> (Fig. 5A). In contrast, when HS<sup>-</sup> is  
249 bound to DosS in the Fe<sup>3+</sup> state, Tyr<sup>171</sup> hydroxyl group rotates downward and establishes a tight  
250 hydrogen bond with HS<sup>-</sup> with the negative sulfur atom as the hydrogen bond acceptor. This results  
251 in the release of Glu<sup>87</sup>, which then moves closer to, and establishes a tight hydrogen bond with,  
252 His<sup>89</sup> and Thr<sup>169</sup> resulting in changes in their relative position, particularly for the loop in the peptide  
253 backbone in which His<sup>89</sup> is located. Disruption of the hydrogen bond between Tyr<sup>171</sup> and Glu<sup>87</sup> is  
254 further promoted by the presence of water molecules between them (Fig 5B). These observations  
255 suggest that the DosS off-state is characterized by strong Tyr<sup>171</sup>-Glu<sup>87</sup> interaction, while the on-  
256 state is characterized by a strong Tyr<sup>171</sup>-HS<sup>-</sup> interaction that releases Glu<sup>87</sup>, which is consistent with  
257 the observation that CO/NO-bound DosS is active and shows the disruption of the hydrogen  
258 bonding network between Tyr<sup>171</sup>-Glu<sup>87</sup>-His<sup>89</sup> (26). Overall it appears that signal transmission to the  
259 histidine kinase domain is initiated by disruption of Glu<sup>87</sup>-Tyr<sup>171</sup> H-bonding and further amplified by  
260 positional changes in the His<sup>89</sup>-containing loop.

261

## 262 **DosS senses H<sub>2</sub>S to regulate the Dos dormancy regulon**

263 To determine whether the H<sub>2</sub>S-mediated activation of DosS is sufficient to drive increased  
264 expression of Dos regulon genes, we exposed WT *Mtb* and *Mtb*  $\Delta$ *dosS*, a *dosS* deletion mutant  
265 (33), to Na<sub>2</sub>S. This was followed by quantitation of mRNA transcripts of representative Dos regulon  
266 genes. As shown in Fig. 6A, *fdxA*, *hspX*, *rv2030c* and *rv2626* transcript levels were markedly  
267 increased in WT *Mtb*, but not  $\Delta$ *dosS*, following exposure to Na<sub>2</sub>S. These results indicate that H<sub>2</sub>S  
268 mediates increased expression of Dos regulon genes via DosS activation, consistent with our  
269 previous observations (7).

270 We next sought to determine whether host-generated H<sub>2</sub>S can be sensed by DosS to  
271 mediate induction of Dos regulon genes. CBS and CSE can produce H<sub>2</sub>S using L-cysteine as a  
272 substrate (34, 35). To avoid potentially confounding effects of CBS/CSE enzyme inhibitors on *Mtb*  
273 as seen previously (7), we chose to use Cys to modulate intracellular levels of H<sub>2</sub>S in RAW 264.7  
274 macrophages. First, we examined H<sub>2</sub>S levels in RAW 264.7 macrophages grown in media  
275 supplemented with L-cysteine using the fluorescent WSP-5 H<sub>2</sub>S-sensing probe (36). We observed  
276 an increased intracellular fluorescence signal in RAW 264.7 macrophages grown in media  
277 containing 0.1-2.0 mM L-cysteine compared to cysteine-free media, with maximum signal observed  
278 at 0.2 mM L-cysteine (Fig. S3). This finding demonstrates that addition of exogenous L-cysteine  
279 increases H<sub>2</sub>S production. Importantly, levels of Cys in serum and cells have been reported to  
280 range between 30-260  $\mu$ M (37-40). On this basis, RAW 264.7 macrophages were grown in  
281 cysteine-free media or media containing 0.2 mM L-cysteine and infected with WT or  $\Delta$ *dosS* *Mtb*.  
282 At 24 hours post-infection, intracellular bacteria were recovered and RNA was extracted. We  
283 observed marked increases in transcript levels of *fdxA*, *hspX*, *rv2030c*, and *rv2626* in WT *Mtb*, but  
284 not  $\Delta$ *dosS* *Mtb*, isolated from macrophages grown in media containing 0.2 mM L-cysteine (Fig. 6B-  
285 I). These data indicate that *Mtb* senses host-derived H<sub>2</sub>S via DosS to induce the expression of Dos  
286 regulon genes.

287

## 288 **Discussion**

289 The *Mtb* DosS/T/R signal transduction system is known to sense three host-derived dormancy  
290 signals, NO (10, 11, 33), O<sub>2</sub> (33, 41), and CO (4, 5) to induce the 48-gene Dos dormancy regulon.  
291 Here, we report that *Mtb* is capable of sensing a fourth gasotransmitter, H<sub>2</sub>S, to induce the Dos  
292 dormancy regulon. Importantly, we show that DosS is capable of sensing H<sub>2</sub>S at levels produced  
293 by macrophages, resulting in the upregulation of key dormancy regulon genes. We also show that  
294 *Mtb* DosS, but not DosT, can sense H<sub>2</sub>S and does so via its heme iron in the ferric state to modulate  
295 its autokinase activity resulting in increased phosphorylation of DosR. The ability of sulfide to bind  
296 DosS ferric heme iron is clearly distinct from that of NO and CO, which bind DosS only when its  
297 heme iron is reduced (Fig. 7). Thus, DosS exhibits remarkable plasticity in sensing multiple



298 gasotransmitters regardless of the oxidation state of the heme iron to ensure induction of the Dos  
299 dormancy regulon during infection. These findings establish a new paradigm for how bacteria  
300 sense multiple signaling molecules with distinct physicochemical properties through a single heme  
301 sensor kinase.

302 The importance of H<sub>2</sub>S as a signaling molecule in the regulation of numerous important  
303 physiological functions in mammals, including immunity, is well established (42, 43). Hence, it is  
304 reasonable that bacterial pathogens have evolved the capacity to detect H<sub>2</sub>S to reprogram their  
305 transcriptomes to subvert the immune response. However, while numerous signaling studies have  
306 been performed in bacteria including, but not limited to, *E. coli*, a gut organism continuously  
307 exposed to H<sub>2</sub>S, little is known regarding whether H<sub>2</sub>S has a direct signal transduction function in  
308 bacteria. More specifically, evidence supporting the ability of bacteria to sense and respond to  
309 host-derived H<sub>2</sub>S via heme sensor kinases in two-component systems is lacking (44, 45).

310 Of note, H<sub>2</sub>S is produced at the site of *Mtb* infection, as demonstrated by the presence of  
311 H<sub>2</sub>S-producing enzymes CSE and 3-MPST around cavities and necrotic lesions in the lungs of TB  
312 patients (6). Since H<sub>2</sub>S is highly diffusible, intracellular and extracellular *Mtb* will be exposed to  
313 host-generated H<sub>2</sub>S. *Mtb* is also exposed to NO (3), CO (2) and hypoxia (46) in the lungs of TB  
314 patients depending on disease stage. NO, CO and H<sub>2</sub>S are produced at different levels and times  
315 throughout the course of infection, which likely vary depending on the particular microanatomical  
316 location and pathology induced by *Mtb*. This, coupled with differing on- and off-rates of these  
317 molecules for DosS and DosT heme iron, strongly suggest that the *Mtb* Dos dormancy regulon is  
318 induced throughout the course of infection. Studies in the macaque model of inhalation TB have  
319 shown that *Mtb*  $\Delta$ *dosS*,  $\Delta$ *dosR* and  $\Delta$ *dosT* mutants are attenuated (47). However, a *Mtb*  $\Delta$ *dosS*  
320 mutant, but not  $\Delta$ *dosR* or  $\Delta$ *dosT* mutants, was shown to be attenuated in C3HeB/FeJ mice and  
321 macrophages (48). Notably, these authors demonstrated that DosS phosphorylates proteins other  
322 than DosR, suggesting that DosS may modulate expression of genes not in the Dos dormancy  
323 regulon (49). These data suggest that the mechanisms by which DosS senses and responds to  
324 environmental signals is more complex than previously thought.

325 Several lines of evidence provide insight into the mechanism whereby *Mtb* senses H<sub>2</sub>S.  
326 Firstly, we found that DosS, but not DosT, is a H<sub>2</sub>S sensor as the latter is in the ferrous oxy-bound  
327 state (Fe<sup>2+</sup>-O<sub>2</sub>) under normoxic conditions. Secondly, sulfide binds DosS under normoxic  
328 conditions where its heme iron is in the ferric form, as demonstrated by UV-Vis and EPR  
329 spectroscopy. Our spectroscopic data also show that binding of sulfide does not alter the oxidation  
330 state of DosS ferric heme iron, and that direct H<sub>2</sub>S binding to the ferric iron changes its spin state  
331 from high to low. Our findings are consistent with several reports showing that sulfide reacts with  
332 heme iron in the ferric (Fe<sup>3+</sup>) state (15-19). This may allow induction of the Dos regulon at earlier  
333 stages of infection prior to the onset of hypoxia when ferrous DosS can respond to NO and CO  
334 only. Thirdly, our MD modeling using the DosS GAF-A domain X-ray structure (PDB code 2W3E)

335 (22) provides key insight into the molecular interactions of sulfide with DosS. Consistent with our  
336 sMD modeling of other hemoproteins (27, 28) H<sub>2</sub>S has more favorable access to the DosS heme  
337 than does HS<sup>-</sup>, which can explain the increase in H<sub>2</sub>S binding to DosS with decreasing pH. This  
338 selectivity is due to the strong hydration of HS<sup>-</sup> compared to H<sub>2</sub>S which significantly hinders HS<sup>-</sup>  
339 entry into the hydrophobic pocket, particularly *via* a “gate” comprised of Phe<sup>98</sup> and Leu<sup>114</sup> side  
340 chains. Further, QM[DFT]/MM calculations demonstrate a stronger Fe-S bond for HS<sup>-</sup> than for H<sub>2</sub>S,  
341 suggesting deprotonation is induced upon binding of H<sub>2</sub>S. Indeed, our hybrid QM/MM simulations  
342 indicate proton transfer from H<sub>2</sub>S via a water molecule to a heme propionate resulting in bound HS<sup>-</sup>  
343 as the final state.

344 To the best of our knowledge, this is the first report of a heme sensor kinase that binds H<sub>2</sub>S  
345 to increase its catalytic activity under physiologically relevant conditions. An important remaining  
346 question is how the binding of H<sub>2</sub>S to DosS increases autokinase activity. Given that a complete  
347 crystal structure for DosS has not been reported, a detailed study of the structural changes in the  
348 kinase domain upon H<sub>2</sub>S binding remains challenging. Nonetheless, structural studies probing the  
349 mechanism by which DosS activity is modulated by the redox state of, and ligand binding to, the  
350 heme iron have shown that an intact hydrogen bonding network comprised of Tyr<sup>171</sup>-Glu<sup>87</sup>-His<sup>89</sup> is  
351 important for inhibition of DosS kinase activity, as seen in the Fe<sup>3+</sup> state (22). Disruption of this  
352 network upon reduction of the heme iron and subsequent binding of NO or CO result in DosS  
353 conformations that favor kinase activity (22, 26, 50, 51). Our MD- and QM/MM-based modeling of  
354 the DosS GAF-A domain predicts that HS<sup>-</sup> ligation to DosS disrupts the distal Tyr<sup>171</sup>-Glu<sup>87</sup>-His<sup>89</sup>  
355 hydrogen bonding network. This is consistent with previously published proposals regarding signal  
356 transmission between the heme and autokinase domains (26) and with our finding of H<sub>2</sub>S-  
357 stimulated autokinase and DosR phosphorylation.

358 Our finding that H<sub>2</sub>S binds DosS in the Fe<sup>3+</sup> state only, and not DosT which is in the Fe<sup>2+</sup>-  
359 O<sub>2</sub> state, demonstrates that the mechanism of H<sub>2</sub>S sensing is distinct from NO and CO, since these  
360 molecules bind DosS in the Fe<sup>2+</sup> state only. We (10) and others (22, 52) have shown that DosS  
361 exists in the Fe<sup>3+</sup> state and requires a reductant to generate ferrous DosS that binds NO or CO.  
362 Ferredoxin (FdxA), reduced flavin nucleotides (22), and chorismate synthase (CS) have been  
363 posited as reductants of ferric DosS (22, 53, 54). FdxA and CS may be candidate reductants as  
364 *fdxA* is part of Dos regulon which is upregulated under hypoxic conditions and CS accelerates  
365 NADH-dependent FMN reduction. These potential reducing systems for DosS-Fe<sup>3+</sup> may represent  
366 an additional aspect of Dos regulon induction, and suggests that in the absence of a reducing  
367 system, the Fe<sup>3+</sup> form of DosS can still induce the Dos regulon via binding of H<sub>2</sub>S. Hence, in the  
368 presence of NO, CO or H<sub>2</sub>S, the Dos regulon will be induced via DosS regardless of whether the  
369 heme iron is in the Fe<sup>2+</sup> or Fe<sup>3+</sup> (unligated or ligated) state. Thus, these findings suggest that DosS  
370 signaling arising due to its redox sensor function and ligand binding are equally important. This  
371 may have important consequences *in vivo* and again suggests that the Dos dormancy regulon is

372 induced through most of the course of infection. It has been shown that NO and hypoxia (11, 55),  
373 and likely CO, inhibit respiration, and all three factors induce the Dos regulon (5, 11, 55). However,  
374 we have shown that H<sub>2</sub>S increases *Mtb* respiration at low concentrations (7) and induces the Dos  
375 regulon under normoxic conditions (Fig. 6 and (7)). These findings suggest that inhibition of  
376 respiration (or hypoxia) is not the sole factor that induces the Dos dormancy regulon, and are  
377 consistent with the action of the TB drug bedaquiline, which also stimulates respiration (56) and  
378 induces the Dos dormancy regulon (57).

379 We (Fig. 1B, (10)) and others (22, 58) have shown that purified DosS exists in the Fe<sup>3+</sup>  
380 state; however, others have reported DosS to be in the ferrous-oxy bound (Fe<sup>2+</sup>-O<sub>2</sub>) form (20, 54).  
381 The reasons for this discrepancy remain unclear but are likely due to differences in protein  
382 purification methodology and experimental approaches. Nonetheless, our EPR and UV-Vis  
383 spectroscopy data spectroscopy provide compelling evidence that DosS heme is in the ferric state  
384 (Fig 1B and 1D). Also, our data showing that DosS can only bind H<sub>2</sub>S in the met (Fe<sup>3+</sup>) state is  
385 consistent with numerous studies demonstrating that ferric, but not ferrous heme iron in proteins  
386 binds H<sub>2</sub>S (15, 16, 18, 45).

387 In light of previous studies showing that *Mtb* infection of macrophages induces upregulation  
388 of host H<sub>2</sub>S-producing enzymes CBS (7) and CSE (6), which leads to excessive levels of H<sub>2</sub>S to  
389 exacerbate disease, it was important to demonstrate that *Mtb* is capable of sensing physiological  
390 levels of H<sub>2</sub>S. Indeed, we demonstrated that WT *Mtb*, but not *Mtb*  $\Delta$ *dosS*, senses endogenous  
391 levels of H<sub>2</sub>S during infection to induce key genes in the Dos regulon *fdxA*, *hspX*, *rv2030c*, and  
392 *rv2626*. This was further confirmed by enhancing H<sub>2</sub>S production in macrophages via substrate  
393 supplementation (6), which lead to increased expression of these Dos dormancy genes. This  
394 provides strong evidence that DosS senses H<sub>2</sub>S during infection.

395 To the best of our knowledge, this is the first report of a heme sensor kinase that binds H<sub>2</sub>S  
396 to increase its catalytic activity under physiologically relevant conditions. Further, our results show  
397 that H<sub>2</sub>S can function as a signaling molecule in *Mtb*. An important remaining question is how the  
398 binding of H<sub>2</sub>S to DosS increases autokinase activity. Given that a complete crystal structure for  
399 DosS has not been reported, a detailed study of the structural changes in the kinase domain upon  
400 H<sub>2</sub>S binding remains challenging. However, our MD-based modeling predicts that H<sub>2</sub>S binding to  
401 DosS disrupts the hydrogen bonding network in the distal domain, which is thought to be a  
402 mechanism of DosS activation (26, 50, 52).

403 In summary, we have shown that H<sub>2</sub>S binds to the redox sensor DosS to increase its  
404 autokinase and phosphate transfer activity, which induces the Dos dormancy regulon (Fig. 7). We  
405 have also shown that physiological levels of H<sub>2</sub>S are sufficient to induce the Dos regulon via DosS.  
406 The ability of *Mtb* to induce the Dos regulon in response to four physiologically relevant  
407 gasotransmitters points to a sophisticated signal transduction system to ensure *Mtb* persistence.

408

409 **Materials and Methods**

410 **Mycobacterial strains and culturing conditions.** *Mtb* H37Rv (BEI Resources (NR-123) and the  
411 *Mtb* H37Rv deletion mutant  $\Delta dosS$  (provided by Dr. David Sherman, University of Washington)  
412 were grown at 37 °C with shaking in Middlebrook 7H9 medium (Difco) supplemented with 10%  
413 (vol/vol) ADS (albumin, dextrose, sodium chloride), 0.2% glycerol and 0.02% tyloxapol. Sodium  
414 sulfide ( $Na_2S \cdot 9H_2O$ ) (Sigma) was added to culture media as an  $H_2S$  donor. Stock solutions of  $Na_2S$   
415 were prepared in argon-deoxygenated 50 mM sodium phosphate buffer (150 mM NaCl, 5%  
416 glycerol, pH 7.4) and contained 100  $\mu M$  DTPA (Diethylenetriaminepentaacetic acid) as a metal  
417 chelator.

418

419 **Expression and Purification of Recombinant DosS and DosT.** DosS and DosT were expressed  
420 in Rosetta (DE3) BL21 *E. coli* cells grown at 37 °C in LB medium as reported previously (10). Briefly,  
421 bacterial cells were grown at 37 °C to an  $OD_{600}$  of 0.5-0.6, at which point hemin (Sigma) was added  
422 to a final concentration of 20  $\mu M$  hemin and protein production was induced by addition of IPTG to  
423 a final concentration of 0.4 mM. Cells were grown overnight at 18°C, collected by centrifugation,  
424 and lysed by sonication in sodium phosphate buffer (pH 7.4). Soluble proteins were extracted by  
425 using Profinity IMAC Ni-charged resin (Bio-Rad, Hercules, CA) as recommended by the  
426 manufacturer. Following elution, proteins were dialyzed against sodium phosphate buffer (pH 7.4)  
427 to remove imidazole.

428

429 **UV-Vis Absorption Spectroscopy.** The absorbance spectra of recombinant DosS and DosT (3  
430  $\mu M$ ) were determined at room temperature using quartz cuvettes with rubber stoppers in a DU800  
431 spectrophotometer (Beckman Coulter, Fullerton, CA). The reduction of recombinant DosS was  
432 achieved via addition of sodium dithionite (DTH) to a final concentration of 100  $\mu M$  while inside an  
433 anaerobic glove box (Plas-Labs, Inc. Lansing, MI). A Hamilton syringe with a thin-gauge needle  
434 was used to add  $Na_2S$  to protein solutions contained in quartz cuvettes (Spectrocell) sealed with a  
435 screw cap containing a rubber septum.

436

437 **EPR Spectroscopy.** Purified DosS protein (10  $\mu M$ ) in sodium phosphate buffer with and without  
438  $Na_2S$  was transferred to thin-walled quartz EPR sample tubes (Wilmad Glass, Buena, NJ) and  
439 snap-frozen in liquid nitrogen. Cryogenic (7K) EPR was measured on a Bruker EMX spectrometer  
440 operating at a frequency of 9.39 GHz, 15-G modulation amplitude, 33 db power, 81.92-ms time  
441 constant, and 41.94-s sweep time. Each sample was scanned 4-8 times and the average taken.

442

443 **Determination of  $K_D^{app}$  for  $H_2S$  binding to DosS.** The  $K_D^{app}$  for  $H_2S$  binding to DosS was  
444 determined by difference spectroscopy using the Soret region. Fractional saturation was

445 determined assuming complete occupancy at 100  $\mu\text{M}$   $[\text{H}_2\text{S}] + [\text{HS}^-]$ ; this was verified by comparing  
446 to 200  $\mu\text{M}$ .

447

448 ***In Vitro* Phosphorylation Assay.** *In vitro* autokinase assays were performed essentially as  
449 described (33). Briefly, recombinant DosS (6  $\mu\text{M}$ ) alone or in the presence of 100  $\mu\text{M}$   $\text{Na}_2\text{S}$  was  
450 assayed for its ability to autophosphorylate in a reaction containing 50  $\mu\text{Ci}$  of  $[\gamma\text{-}^{32}\text{P}]\text{-ATP}$   
451 (6000 Ci/mmol, PerkinElmer Health Sciences), 100 mM Tris-HCl, pH 7.4, 5 mM  $\text{MgCl}_2$ , 50 mM  $\text{KCl}_2$   
452 in a final volume of 20  $\mu\text{l}$ . The reaction was carried out at room temperature, and 4  $\mu\text{l}$  aliquots of  
453 reaction mixture were removed from the reaction at various time points between 0 to 60 mins. The  
454 reaction at each time point was stopped by adding 2X SDS-PAGE sample buffer. The samples  
455 were resolved on 4-20% gradient PAGE gels (Bio-Rad) without heating. Resolved proteins were  
456 transferred to a PVDF membrane which was exposed to a phosphor screen (Amersham) overnight.  
457 The phosphor screen was scanned on a FLA7000IP Typhoon Storage Phosphorimager.  
458 Transphosphorylation assays were performed as above, except that DosS and DosR proteins were  
459 present in a molar ratio of 1:6, respectively.

460

461 ***Mtb* RNA Isolation and qRT-PCR Analysis.** *Mtb* was grown to an  $\text{OD}_{600}$  of 0.4-0.5, and then  
462  $\text{Na}_2\text{S}$  was added to a final concentration of 50  $\mu\text{M}$ . After incubation at 37  $^\circ\text{C}$  for 30 min, a volume  
463 of 4M guanidine thiocyanate solution equal to the culture volume was added, and cells were  
464 collected by centrifugation. The cell pellet was washed 1X time with PBS and then suspended in  
465 1 ml RNAPro solution (MP Biomedicals). The cells were then added to a 2 mL tube containing 0.1  
466 mm Lysing Matrix B beads (MP Biomedicals) and were lysed using a Fastprep-24 bead beater(MP  
467 Biomedicals). The lysate was centrifuged to pellet cell debris. 500  $\mu\text{l}$  of chloroform was added to  
468 the supernatant fraction which was then vortexed and centrifuged for phase separation. Total RNA  
469 was isolated from the aqueous layer using a Qiagen RNA isolation kit, following the manufacturer's  
470 instructions. RNA was treated with DNaseI prior to qRT-PCR analysis. 500 ng of DNaseI-treated  
471 RNA was used for cDNA synthesis using the iScript cDNA synthesis kit (Bio-Rad, USA).  
472 Quantitative RT-PCR was performed using SsoAdvanced SYBR green supermix (Bio-Rad, USA)  
473 with the Bio-Rad CFX96 detection system according to the manufacturer's instructions.  
474 Quantitative RT-PCR reactions were performed in duplicate using three independent *Mtb* cultures.  
475 Relative changes in gene expression were determined using the  $2\Delta\text{Ct}$  method (59), where Ct  
476 values of target genes were normalized to Ct values of *Mtb sigA* mRNA. Relative changes were  
477 determined as the ratio of expression of genes between untreated and  $\text{Na}_2\text{S}$ -exposed cultures.  
478 Primers used in this study are listed in [Table 1](#).

479

480 **Macrophage infection and isolation of intracellular *Mtb*.** RAW 264.7 macrophages (ATCC)  
481 were cultured in DMEM medium (Gibco) containing 10% heat-inactivated FBS and 10 mM HEPES

482 to maintain pH 7.4. RAW 264.7 macrophages were grown in 75 cm<sup>2</sup> flasks and infected at a MOI  
483 of 1:10 for 2 hours using *Mtb* in log-phase growth. After removing infection media, cells were  
484 washed 2X with fresh DMEM medium and incubated in complete media containing the desired  
485 concentration of L-cysteine (0-2.0 mM) for 24 hours. The L-cysteine-containing media was  
486 removed and cells were washed 1X time with fresh media. Next, intracellular *Mtb* bacilli were  
487 isolated essentially as described by Rohde et al. (60) with a few modifications. Briefly, infected  
488 macrophages were lysed in a solution of 4M guanidine thiocyanate, 0.5% Na N-lauryl sarcosine,  
489 25 mM sodium citrate, and 0.1 M  $\beta$ -mercaptoethanol. Lysate were vortexed and passed through a  
490 21 gauge needle ten times to shear genomic DNA and reduce viscosity. Intracellular mycobacteria  
491 were recovered by centrifugation at  $\sim$ 2,700 x g for 30 min. The bacterial pellet was suspended in  
492 100  $\mu$ l PBS and lysozyme was added to a final concentration of 0.1 mg/ml and incubated for 30 min  
493 at RT. The bacilli were lysed in 1 ml Trizol heated to 65°C with 0.1 mm Lysing Matrix B silicon  
494 beads using a Fastprep-24. Next, the lysate was centrifuged to pellet cell debris and the  
495 supernatant fraction was treated with 500  $\mu$ l of chloroform, vortexed, and centrifuged. RNA was  
496 isolated from the aqueous layer using a Qiagen RNA isolation kit, following the manufacturer's  
497 instructions. RNA was DNase treated prior to qRT-PCR analysis. A negative control group  
498 containing bacteria only was treated with complete DMEM was used to determine baseline gene  
499 expression levels.

500

501 **Detection of Intracellular H<sub>2</sub>S Using the WSP-5 Probe.** The H<sub>2</sub>S-specific WSP-5 fluorescent  
502 probe (CAS # 1593024-78-2) was prepared according to the manufacturer's instructions. Cell  
503 staining was performed as described (36) with some modifications. Briefly, 5x10<sup>4</sup> RAW 264.7  
504 macrophages were plated in each well of 96 well plate and incubated overnight in DMEM medium  
505 containing the desired concentration of L-cysteine. The next day the medium was removed, and  
506 fresh medium containing 100  $\mu$ M CTAB, the desired L-cysteine concentration, and 50  $\mu$ M WSP-5  
507 probe was added. After 30 min, the WSP-5-containing medium was removed, the cells were  
508 washed once with PBS and placed in fresh PBS for imaging. Fluorescence imaging was performed  
509 using Biotek Cytation 5 plate reader.

510

## 511 **Computational Methods**

512

513 **Starting Structure.** The starting structure of the DosS heme-containing GAF-A domain was built  
514 from the corresponding X-ray structure (PDB entry code 2w3e) (22). Protonation states of amino  
515 acids were those corresponding to their physiological state at neutral pH (i.e., Asp and Glu  
516 negatively charged, Lys and Arg positively charged). His149, corresponding to the heme proximal  
517 ligand, was simulated in the HID state (with protonated N  $\delta$ ). The remaining His residues were  
518 simulated favoring H-bond formation. Particular care was taken for His<sup>89</sup> which is part of the distal

519 H-bond network. Since the template crystal structure consists of a truncated GAF-A domain, a C-  
520 terminal carboxyl group is present that is not present in the full structure. To account for this, a N-  
521 CH<sub>3</sub> “cap” was added to this carboxyl groups to avoid interaction with nearby positive residues. The  
522 system was solvated by constructing an octahedral box of 10-12 Å using AmberTools.

523

524 **Classical Molecular Dynamics (MD) Simulations.** The MD simulations were performed using  
525 the Assisted Model Building with Energy Refinement (AMBER) package (61). Heme, as well as  
526 bound and free H<sub>2</sub>S and HS<sup>-</sup> parameters, were taken from our previous work related to H<sub>2</sub>S/HS<sup>-</sup>  
527 binding to heme proteins (28). All MD simulations were performed using periodic boundary  
528 conditions, SHAKE algorithm and the particle mesh Ewald (PME) summation method for treating  
529 the electrostatic interactions using default AMBER 16 parameters (61). Each system was first  
530 optimized, and then slowly equilibrated to reach proper temperature and pressure values using the  
531 Langevin thermostat and Berendsen barostat (62). All four truncated endpoints of the protein  
532 (exposed to solvent) were simulated with mild restraints applied to them to maintain α-helix  
533 structure.

534

535 **Ligand Binding Free Energy Profiles.** To determine H<sub>2</sub>S/HS<sup>-</sup> binding free energy profiles, we  
536 used our previously developed and extensively used Steered MD (sMD) approach combined with  
537 Jarzynski’s equation (63, 64). Briefly, in each simulation the ligand is pulled towards the heme iron  
538 inside the protein active site using a harmonic guiding potential at constant speed, and the  
539 corresponding work performed on the system is recorded. Several simulations are performed  
540 starting from different initial conformations with the ligand outside the protein, and finally the  
541 corresponding free energy profile is obtained combining the corresponding work profiles using  
542 Jarzynski’s equality. We employed 98 different trajectories for H<sub>2</sub>S and 89 for HS<sup>-</sup>. In all cases,  
543 the guiding coordinate was the Fe-S distance, using a force constant of 200 kcal/mol.Å<sup>2</sup> and a  
544 speed of 0.0025 Å/ps.

545

546 **Hybrid Quantum Mechanics/Molecular Mechanics Simulations.** QM/MM simulations were  
547 performed with our own extensively tested and developed code, called LIO which combines a  
548 Gaussian-based density functional theory (DFT) approach implemented in CUDA with the AMBER  
549 force field and is implemented as a QM/MM option in AMBER (65). System parameters were the  
550 same as in our previous QM/MM work on heme proteins (26, 28). Briefly, the heme, its proximal  
551 and distal ligands, a nearby water molecule and a heme propionate define the QM subsystem, and  
552 the remaining protein and solvent atoms the classical system. Covalent bonds between QM and  
553 MM subsystems were treated using the Link atom method (66). The QM system is simulated using  
554 a double Z plus polarization basis set (67) and the PBE exchange-correlation functional (68). Heme

555 iron in the Fe<sup>3+</sup> state bound to H<sub>2</sub>S/HS<sup>-</sup> was simulated in the low-spin state. We performed a 2.0  
556 ps MD simulation, starting from a snapshot extracted from the previously optimized MD simulation.  
557

### 558 **Acknowledgements**

559 This work was supported by NIH grants R01AI111940, R01AI138280, R01AI134810 (AJCS) and  
560 R01HL098032 (DBKS), a Bill and Melinda Gates Foundation Award (OPP1130017) (AJCS) and  
561 pilot funds from the UAB CFAR, CFRB, and Infectious Diseases and Global Health and Vaccines  
562 Initiative (AJCS). The research was also funded in part by the South African Medical Research  
563 Council to AJCS. QM/MM simulation studies were supported by grants from the Universidad de  
564 Buenos Aires (UBACYT 20020120300025BA), Agencia Nacional de Promoción Científica y  
565 Tecnológica (PICT 2016-0568, PICT 2014-1022, and PICT 2015-2761) and CONICET Grant  
566 11220150100303CO. M.P. holds a CONICET Ph.D. fellowship. The authors wish to thank the staff  
567 and management of Southeastern Biosafety Laboratory Alabama Birmingham (SEBLAB), a NIAID-  
568 supported (UC6 AI058599) Regional Biocontainment Laboratory. The authors wish to thank  
569 Hayden T. Pacl for assistance in image analyses.



## 570 References

- 571 1. Anonymous, Global tuberculosis report 2020. Geneva: World Health Organization; 2020.  
572 Licence: CC BY-NC-SA 3.0 IGO. (2020).
- 573 2. K. C. Chinta *et al.*, Microanatomic Distribution of Myeloid Heme Oxygenase-1 Protects  
574 against Free Radical-Mediated Immunopathology in Human Tuberculosis. *Cell Rep* **25**,  
575 1938-1952 e1935 (2018).
- 576 3. S. Nicholson *et al.*, Inducible nitric oxide synthase in pulmonary alveolar macrophages  
577 from patients with tuberculosis. *J Exp Med* **183**, 2293-2302 (1996).
- 578 4. A. Kumar *et al.*, Heme oxygenase-1-derived carbon monoxide induces the Mycobacterium  
579 tuberculosis dormancy regulon. *J Biol Chem* **283**, 18032-18039 (2008).
- 580 5. M. U. Shiloh, P. Manzanillo, J. S. Cox, Mycobacterium tuberculosis senses host-derived  
581 carbon monoxide during macrophage infection. *Cell Host Microbe* **3**, 323-330 (2008).
- 582 6. M. A. Rahman *et al.*, Hydrogen sulfide dysregulates the immune response by suppressing  
583 central carbon metabolism to promote tuberculosis. *Proc Natl Acad Sci U S A* **117**, 6663-  
584 6674 (2020).
- 585 7. V. Saini *et al.*, Hydrogen sulfide stimulates Mycobacterium tuberculosis respiration,  
586 growth and pathogenesis. *Nat Commun* **11**, 557 (2020).
- 587 8. S. T. Cole *et al.*, Deciphering the biology of Mycobacterium tuberculosis from the  
588 complete genome sequence. *Nature* **393**, 537-544 (1998).
- 589 9. A. K. Kinger, J. S. Tyagi, Identification and cloning of genes differentially expressed in the  
590 virulent strain of Mycobacterium tuberculosis. *Gene* **131**, 113-117 (1993).
- 591 10. A. Kumar, J. C. Toledo, R. P. Patel, J. R. Lancaster, Jr., A. J. Steyn, Mycobacterium  
592 tuberculosis DosS is a redox sensor and DosT is a hypoxia sensor. *Proc Natl Acad Sci U S A*  
593 **104**, 11568-11573 (2007).
- 594 11. M. I. Voskuil *et al.*, Inhibition of respiration by nitric oxide induces a Mycobacterium  
595 tuberculosis dormancy program. *J Exp Med* **198**, 705-713 (2003).
- 596 12. L. Fu *et al.*, Direct Proteomic Mapping of Cysteine Persulfidation. *Antioxid Redox Signal*  
597 **33**, 1061-1076 (2020).
- 598 13. M. R. Filipovic, J. Zivanovic, B. Alvarez, R. Banerjee, Chemical Biology of H<sub>2</sub>S Signaling  
599 through Persulfidation. *Chem Rev* **118**, 1253-1337 (2018).
- 600 14. R. Kumar, R. Banerjee, Regulation of the redox metabolome and thiol proteome by  
601 hydrogen sulfide. *Crit Rev Biochem Mol Biol* 10.1080/10409238.2021.1893641, 1-15  
602 (2021).
- 603 15. F. R. S. D. Keilin, On the combination of Methaemoglobin with H<sub>2</sub>S. *Proceedings of the*  
604 *Royal Society of London* **113**, 11 (1933).
- 605 16. B. Jensen, A. Fago, Reactions of ferric hemoglobin and myoglobin with hydrogen sulfide  
606 under physiological conditions. *J Inorg Biochem* **182**, 133-140 (2018).
- 607 17. D. W. Kraus, J. B. Wittenberg, J. F. Lu, J. Peisach, Hemoglobins of the *Lucina*  
608 *pectinata*/bacteria symbiosis. II. An electron paramagnetic resonance and optical spectral  
609 study of the ferric proteins. *J Biol Chem* **265**, 16054-16059 (1990).
- 610 18. A. C. Mot *et al.*, Fe(III) - Sulfide interaction in globins: Characterization and quest for a  
611 putative Fe(IV)-sulfide species. *J Inorg Biochem* **179**, 32-39 (2018).
- 612 19. R. Pietri *et al.*, Factors controlling the reactivity of hydrogen sulfide with heme proteins.  
613 *Biochemistry* **48**, 4881-4894 (2009).
- 614 20. E. H. Sousa, J. R. Tuckerman, G. Gonzalez, M. A. Gilles-Gonzalez, DosT and DevS are  
615 oxygen-switched kinases in Mycobacterium tuberculosis. *Protein Sci* **16**, 1708-1719  
616 (2007).

- 617 21. R. J. P. W. D. W. Smith, *The spectra of ferric haems and haemoproteins*, Structure and  
618 Bonding (1970), vol. 7.
- 619 22. H. Y. Cho, H. J. Cho, Y. M. Kim, J. I. Oh, B. S. Kang, Structural insight into the heme-based  
620 redox sensing by DosS from Mycobacterium tuberculosis. *J Biol Chem* **284**, 13057-13067  
621 (2009).
- 622 23. K. Y. C. a. J. C. Morris, Kinetics of Oxidation of Aqueous Sulfide by O<sub>2</sub>. *Environmental*  
623 *Science & Technology* **6**, 9 (1972).
- 624 24. J. Peisach, W. E. Blumberg, S. Ogawa, E. A. Rachmilewitz, R. Oltzik, The effects of protein  
625 conformation on the heme symmetry in high spin ferric heme proteins as studied by  
626 electron paramagnetic resonance. *J Biol Chem* **246**, 3342-3355 (1971).
- 627 25. H. R. D. Takashi Y, John S. Leigh, Jr. George H. Reed, Michael R. Water-Man, and Toshio  
628 Asakura, Electromagnetic Properties of Hemoproteins. *The Journal of Biological Chemistry*  
629 **245**, 2998-3003 (1970).
- 630 26. Y. Madrona, C. A. Waddling, P. R. Ortiz de Montellano, Crystal structures of the CO and  
631 NOBound DosS GAF-A domain and implications for DosS signaling in Mycobacterium  
632 tuberculosis. *Arch Biochem Biophys* **612**, 1-8 (2016).
- 633 27. F. M. Boubeta *et al.*, Mechanism of Sulfide Binding by Ferric Hemeproteins. *Inorg Chem*  
634 **57**, 7591-7600 (2018).
- 635 28. F. M. Boubeta, S. E. Bari, D. A. Estrin, L. Boechi, Access and Binding of H<sub>2</sub>S to  
636 Hemoproteins: The Case of Hbl of *Lucina pectinata*. *J Phys Chem B* **120**, 9642-9653 (2016).
- 637 29. D. E. Bikiel *et al.*, Modeling heme proteins using atomistic simulations. *Phys Chem Chem*  
638 *Phys* **8**, 5611-5628 (2006).
- 639 30. L. Capece *et al.*, Small ligand-globin interactions: reviewing lessons derived from  
640 computer simulation. *Biochim Biophys Acta* **1834**, 1722-1738 (2013).
- 641 31. A. B. Anderson, C. R. Robertson, Absorption spectra indicate conformational alteration of  
642 myoglobin adsorbed on polydimethylsiloxane. *Biophys J* **68**, 2091-2097 (1995).
- 643 32. H. Wajcman *et al.*, Hemoglobin Redondo [beta 92(F8) His----Asn]: an unstable hemoglobin  
644 variant associated with heme loss which occurs in two forms. *Am J Hematol* **38**, 194-200  
645 (1991).
- 646 33. D. M. Roberts, R. P. Liao, G. Wisedchaisri, W. G. Hol, D. R. Sherman, Two sensor kinases  
647 contribute to the hypoxic response of Mycobacterium tuberculosis. *J Biol Chem* **279**,  
648 23082-23087 (2004).
- 649 34. A. E. Braunstein, E. V. Goryachenkova, E. A. Tolosa, I. H. Willhardt, L. L. Yefremova,  
650 Specificity and some other properties of liver serine sulphhydryase: evidence for its  
651 identity with cystathionine -synthase. *Biochim Biophys Acta* **242**, 247-260 (1971).
- 652 35. M. H. Stipanuk, P. W. Beck, Characterization of the enzymic capacity for cysteine  
653 desulphhydration in liver and kidney of the rat. *Biochem J* **206**, 267-277 (1982).
- 654 36. B. Peng *et al.*, Fluorescent probes based on nucleophilic substitution-cyclization for  
655 hydrogen sulfide detection and bioimaging. *Chemistry* **20**, 1010-1016 (2014).
- 656 37. M. P. Brigham, W. H. Stein, S. Moore, The Concentrations of Cysteine and Cystine in  
657 Human Blood Plasma. *J Clin Invest* **39**, 1633-1638 (1960).
- 658 38. G. Murphy *et al.*, Prospective study of serum cysteine levels and oesophageal and gastric  
659 cancers in China. *Gut* **60**, 618-623 (2011).
- 660 39. Y. V. Tcherkas, A. D. Denisenko, Simultaneous determination of several amino acids,  
661 including homocysteine, cysteine and glutamic acid, in human plasma by isocratic  
662 reversed-phase high-performance liquid chromatography with fluorimetric detection. *J*  
663 *Chromatogr A* **913**, 309-313 (2001).

- 664 40. Y. Zhang *et al.*, Dual emission channels for sensitive discrimination of Cys/Hcy and GSH in  
665 plasma and cells. *Chem Commun (Camb)* **51**, 4245-4248 (2015).
- 666 41. H. D. Park *et al.*, Rv3133c/dosR is a transcription factor that mediates the hypoxic  
667 response of Mycobacterium tuberculosis. *Mol Microbiol* **48**, 833-843 (2003).
- 668 42. N. Dilek, A. Papapetropoulos, T. Toliver-Kinsky, C. Szabo, Hydrogen sulfide: An  
669 endogenous regulator of the immune system. *Pharmacol Res* **161**, 105119 (2020).
- 670 43. R. Wang, Physiological implications of hydrogen sulfide: a whiff exploration that  
671 blossomed. *Physiol Rev* **92**, 791-896 (2012).
- 672 44. V. Fojtikova *et al.*, Effects of hydrogen sulfide on the heme coordination structure and  
673 catalytic activity of the globin-coupled oxygen sensor AfGcHK. *Biometals* **29**, 715-729  
674 (2016).
- 675 45. H. Takahashi *et al.*, Hydrogen sulfide stimulates the catalytic activity of a heme-regulated  
676 phosphodiesterase from Escherichia coli (Ec DOS). *J Inorg Biochem* **109**, 66-71 (2012).
- 677 46. M. Belton *et al.*, Hypoxia and tissue destruction in pulmonary TB. *Thorax* **71**, 1145-1153  
678 (2016).
- 679 47. S. Mehra *et al.*, The DosR Regulon Modulates Adaptive Immunity and Is Essential for  
680 Mycobacterium tuberculosis Persistence. *Am J Respir Crit Care Med* **191**, 1185-1196  
681 (2015).
- 682 48. U. S. Gautam *et al.*, DosS Is required for the complete virulence of mycobacterium  
683 tuberculosis in mice with classical granulomatous lesions. *Am J Respir Cell Mol Biol* **52**,  
684 708-716 (2015).
- 685 49. U. S. Gautam *et al.*, Mycobacterium tuberculosis sensor kinase DosS modulates the  
686 autophagosome in a DosR-independent manner. *Commun Biol* **2**, 349 (2019).
- 687 50. D. Basudhar *et al.*, Distal Hydrogen-bonding Interactions in Ligand Sensing and Signaling  
688 by Mycobacterium tuberculosis DosS. *J Biol Chem* **291**, 16100-16111 (2016).
- 689 51. E. T. Yukl, A. Ioanoviciu, M. M. Nakano, P. R. de Montellano, P. Moenne-Loccoz, A distal  
690 tyrosine residue is required for ligand discrimination in DevS from Mycobacterium  
691 tuberculosis. *Biochemistry* **47**, 12532-12539 (2008).
- 692 52. H. Y. Cho, H. J. Cho, M. H. Kim, B. S. Kang, Blockage of the channel to heme by the E87  
693 side chain in the GAF domain of Mycobacterium tuberculosis DosS confers the unique  
694 sensitivity of DosS to oxygen. *FEBS Lett* **585**, 1873-1878 (2011).
- 695 53. F. Ely *et al.*, The Mycobacterium tuberculosis Rv2540c DNA sequence encodes a  
696 bifunctional chorismate synthase. *BMC Biochem* **9**, 13 (2008).
- 697 54. A. Ioanoviciu, Y. T. Meharena, T. L. Poulos, P. R. Ortiz de Montellano, DevS oxy complex  
698 stability identifies this heme protein as a gas sensor in Mycobacterium tuberculosis  
699 dormancy. *Biochemistry* **48**, 5839-5848 (2009).
- 700 55. M. I. Voskuil, K. C. Visconti, G. K. Schoolnik, Mycobacterium tuberculosis gene expression  
701 during adaptation to stationary phase and low-oxygen dormancy. *Tuberculosis (Edinb)* **84**,  
702 218-227 (2004).
- 703 56. J. S. Mackenzie *et al.*, Bedaquiline reprograms central metabolism to reveal glycolytic  
704 vulnerability in Mycobacterium tuberculosis. *Nat Commun* **11**, 6092 (2020).
- 705 57. A. Koul *et al.*, Delayed bactericidal response of Mycobacterium tuberculosis to  
706 bedaquiline involves remodelling of bacterial metabolism. *Nat Commun* **5**, 3369 (2014).
- 707 58. H. Zheng *et al.*, Inhibitors of Mycobacterium tuberculosis DosRST signaling and  
708 persistence. *Nat Chem Biol* **13**, 218-225 (2017).
- 709 59. T. D. Schmittgen, K. J. Livak, Analyzing real-time PCR data by the comparative C(T) method.  
710 *Nat Protoc* **3**, 1101-1108 (2008).

- 711 60. K. H. Rohde, R. B. Abramovitch, D. G. Russell, Mycobacterium tuberculosis invasion of  
712 macrophages: linking bacterial gene expression to environmental cues. *Cell Host Microbe*  
713 **2**, 352-364 (2007).
- 714 61. K. B. D.A. Case, I.Y. Ben-Shalom, S.R. Brozell, D.S. Cerutti, T.E. Cheatham, III, V.W.D.  
715 Cruzeiro, T.A. Darden, R.E. Duke, G. Giambasu, M.K. Gilson, H. Gohlke, A.W. Goetz, R.  
716 Harris, S. Izadi, S.A. Izmailov, K. Kasavajhala, A. Kovalenko, R. Krasny, T. Kurtzman, T.S.  
717 Lee, S. LeGrand, P. Li, C. Lin, J. Liu, T. Luchko, R. Luo, V. Man, K.M. Merz, Y. Miao, O.  
718 Mikhailovskii, G. Monard, H. Nguyen, A. Onufriev, F.Pan, S. Pantano, R. Qi, D.R. Roe, A.  
719 Roitberg, C. Sagui, S. Schott-Verdugo, J. Shen, C.L. Simmerling, N.R.Skrynnikov, J. Smith, J.  
720 Swails, R.C. Walker, J. Wang, L. Wilson, R.M. Wolf, X. Wu, Y. Xiong, Y. Xue, D.M. York and  
721 P.A. Kollman (2020) AMBER 2020.
- 722 62. H. J. C. P. Berendsen, J. P. M.; van Gunsteren, W. F.; DiNola, A.; Haak, J. R, Molecular  
723 dynamics with coupling to an external bath. *The Journal of Chemical Physics* **81** (1984).
- 724 63. M. Arrar *et al.*, On the accurate estimation of free energies using the jarzynski equality. *J*  
725 *Comput Chem* **40**, 688-696 (2019).
- 726 64. C. Jarzynski, Nonequilibrium Equality for Free Energy Differences. *Physical Review Letters*  
727 **78**, 2690-2693 (1997).
- 728 65. J. P. Marcolongo *et al.*, Chemical Reactivity and Spectroscopy Explored From QM/MM  
729 Molecular Dynamics Simulations Using the LIO Code. *Front Chem* **6**, 70 (2018).
- 730 66. M. E. a. P. Tavan, A hybrid method for solutes in complex solvents: Density functional  
731 theory combined with empirical force fields. *The Journal of Chemical Physics* **110** (1999).
- 732 67. N. Godbout, D. R. Salahub, J. Andzelm, E. Wimmer, Optimization of Gaussian-type basis  
733 sets for local spin density functional calculations. Part I. Boron through neon, optimization  
734 technique and validation. *Canadian Journal of Chemistry* **70**, 560-571 (1992).
- 735 68. J. P. Perdew, K. Burke, M. Ernzerhof, Generalized Gradient Approximation Made Simple.  
736 *Phys Rev Lett* **77**, 3865-3868 (1996).
- 737

738 **Figures**

739

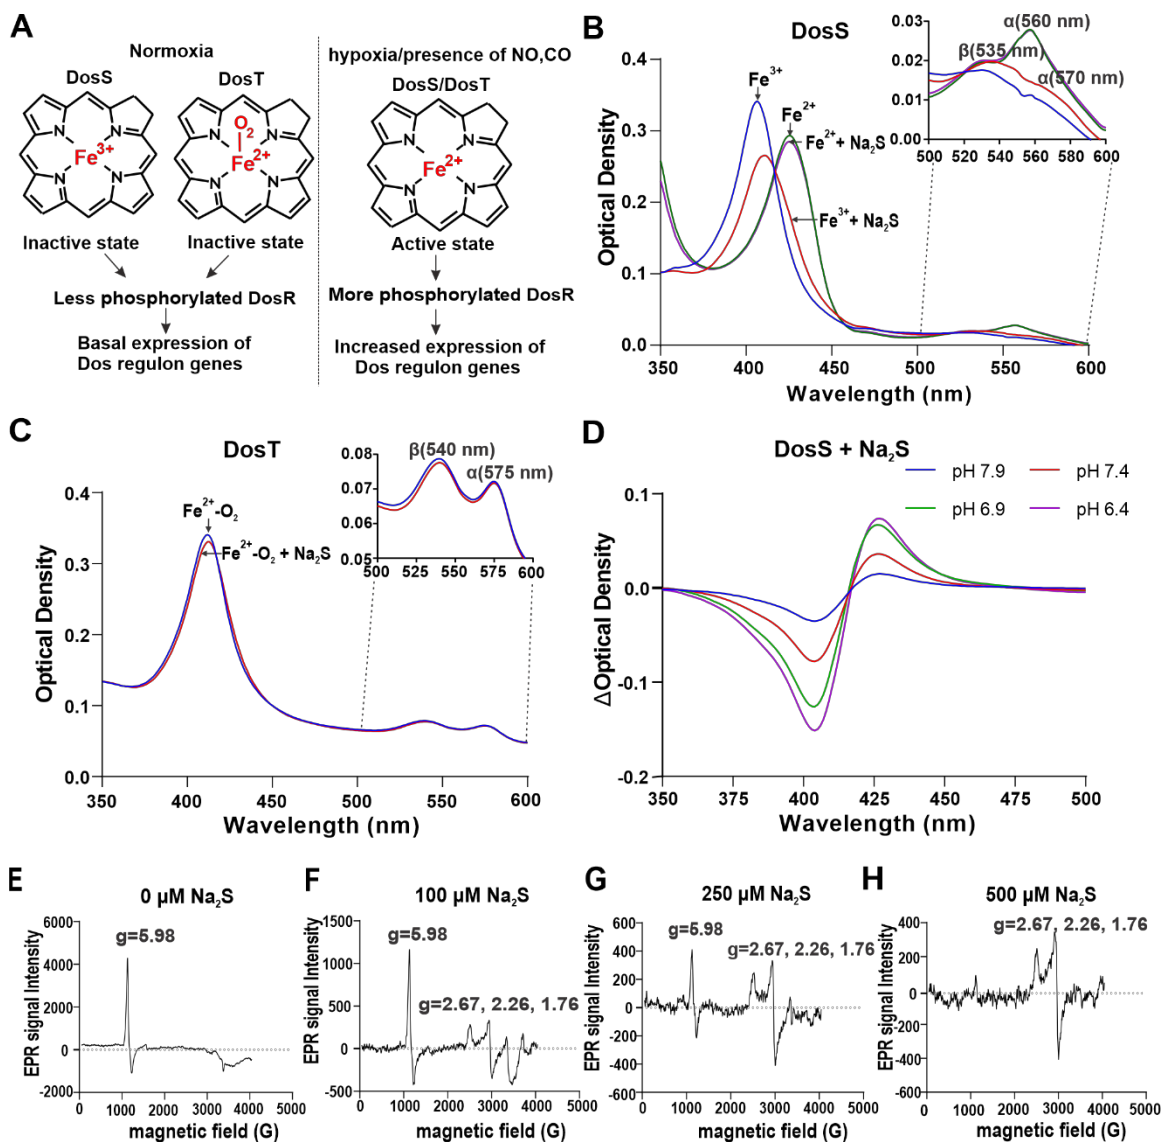

740

741 **Fig. 1. Characterization of DosS binding to H<sub>2</sub>S.** (A) Depictions of DosS and DosT sensing of  
 742 O<sub>2</sub>, NO and CO under various conditions. (B) Representative UV-Visible absorption spectra of  
 743 recombinant DosS (3 μM) in the Fe<sup>3+</sup> form (blue curve), the Fe<sup>3+</sup> form in the presence of 100 μM  
 744 Na<sub>2</sub>S (red curve), the Fe<sup>2+</sup> form in the presence of 100 μM DTH (green curve) and the Fe<sup>2+</sup> form in  
 745 the presence of 100 μM DTH and 100 μM Na<sub>2</sub>S (orange curve). (Inset) Absorption spectra replotted  
 746 to highlight the α and β absorption peaks of the Fe<sup>3+</sup> form (α at 570 nm and β at 535 nm), and the  
 747 Fe<sup>2+</sup> form (α at 560 nm). (C) Representative UV-Visible absorption spectra of recombinant DosT  
 748 (3 μM) in the Fe<sup>2+</sup>-O<sub>2</sub> form (blue curve) and the Fe<sup>2+</sup>-O<sub>2</sub> form in the presence of 100 μM Na<sub>2</sub>S (red  
 749 curve). (Inset) Absorption spectra replotted to highlight the α (570 nm) and β (535 nm) peaks. (D)  
 750 Changes to the UV-Visible absorption spectra of the Fe<sup>3+</sup> form of recombinant DosS (3 μM)

751 resulting from the addition of 25  $\mu\text{M}$   $\text{Na}_2\text{S}$  at different pH conditions, relative to DosS without  $\text{Na}_2\text{S}$ .  
752 (*E-H*) EPR spectroscopic analysis of recombinant DosS showing a single axial peak characteristic  
753 of paramagnetic high-spin  $\text{Fe}^{3+}$  heme iron. DosS alone (*E*), and in the presence of increasing  
754 concentrations of  $\text{Na}_2\text{S}$  (*F-H*) which shows the appearance of additional peaks characteristic of the  
755 low-spin state of heme iron. UV-Vis spectra are representative of at least 5 independent  
756 measurements.  
757

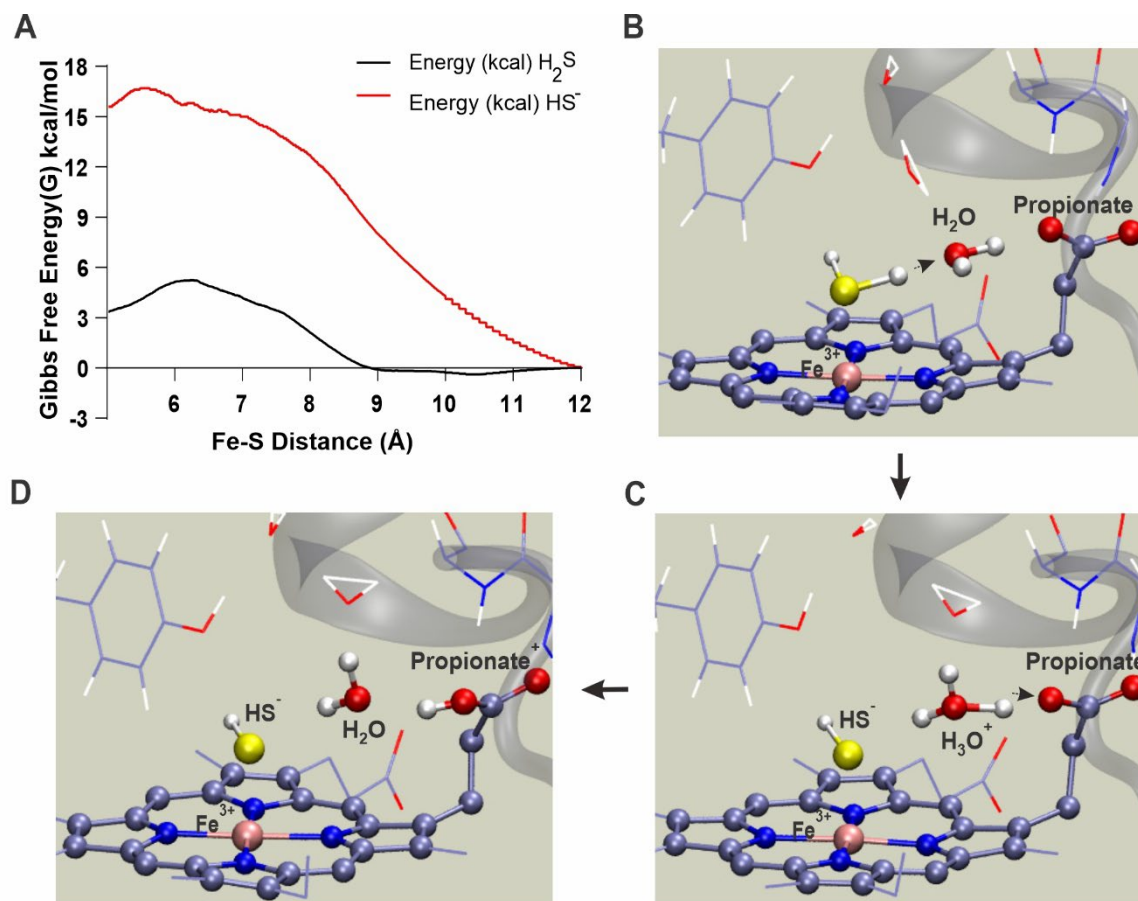

758

759 **Fig. 2. Molecular modeling of DosS interaction with H<sub>2</sub>S.** (A) Calculated average association  
760 free energy profiles for H<sub>2</sub>S and HS<sup>-</sup> as a function of intermolecular distance between the DosS  
761 heme iron and sulfur. Free energy values were generated by employing 98 separate trajectories  
762 for H<sub>2</sub>S and 89 trajectories for HS<sup>-</sup> using a steered Molecular Dynamics (sMD) approach. (B-D)  
763 QM/MM MD simulation snapshots depicting the steps of a predicted proton transfer from H<sub>2</sub>S to a  
764 nearby heme propionate group through a water bridge within 0.3 ps of MD. The QM subsystem  
765 atoms are shown in ball and stick representation.

766

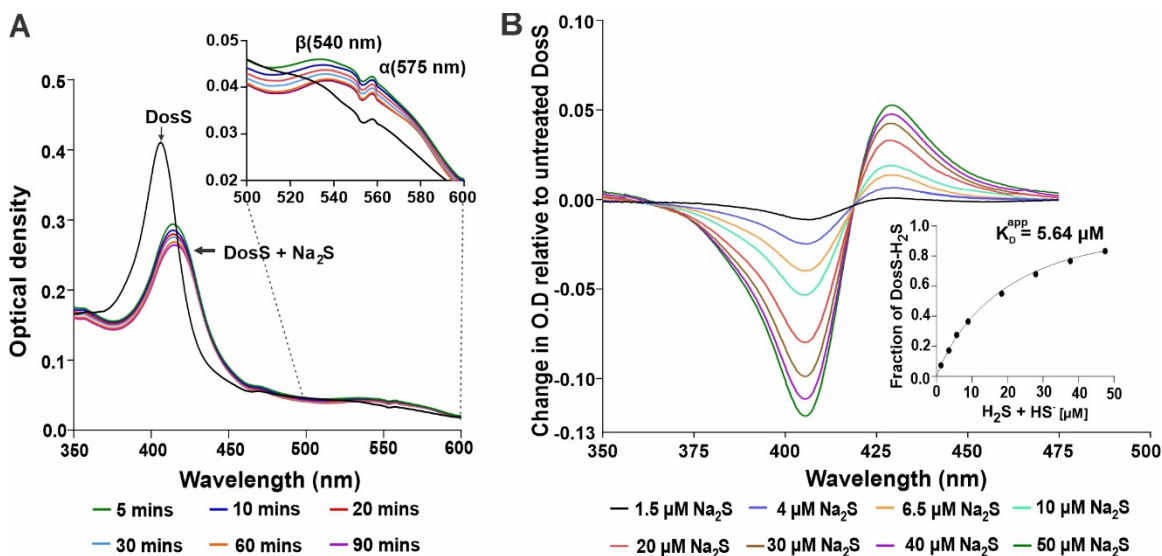

767

768 **Fig. 3. H<sub>2</sub>S does not reduce the DosS heme iron and binds with low micromolar affinity (A)**

769 Representative UV-Visible spectra of the Fe<sup>3+</sup> form of DosS (3 μM) for 5-90 minutes following the

770 addition of 200 μM Na<sub>2</sub>S. (*Inset*) Absorption spectra replotted to highlight the α (570 nm) and β

771 (535 nm) peaks. The lack of red shift over time following addition of Na<sub>2</sub>S as well as the absence

772 of a strong α peak at 560 nm indicate that the DosS heme iron is not reduced in the presence of

773 sulfide within 90 minutes. A small spectral artifact caused by spectrophotometer filter switching is

774 present at ~550 nm. (B) Representative changes to the UV-Visible spectra of recombinant DosS

775 (3 μM) resulting from the addition of different concentrations of Na<sub>2</sub>S, relative to DosS without Na<sub>2</sub>S.

776 (*Inset*) Substrate saturation curve of DosS-H<sub>2</sub>S binding was generated using UV-Vis absorption

777 data points obtained from the titration DosS with increasing concentrations of Na<sub>2</sub>S. UV-Vis spectra

778 are representative of at least 3 independent assays.

779



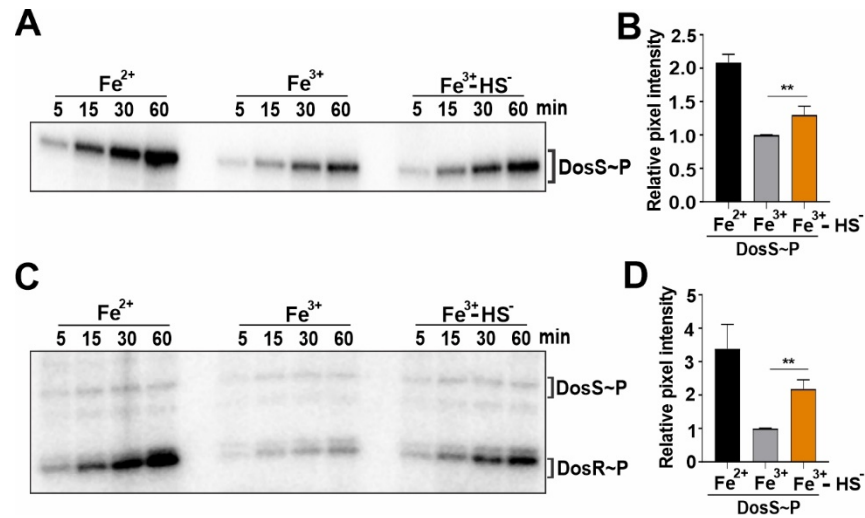

780

781 **Fig. 4. H<sub>2</sub>S stimulates DosS and DosR phosphorylation.** (A) Representative autoradiogram of  
782 PAGE-resolved <sup>32</sup>P-labeled recombinant DosS following autophosphorylation in the presence of  $\gamma$ -  
783 <sup>32</sup>P-ATP alone (left and center panels) or with  $\gamma$ -<sup>32</sup>P-ATP in the presence of 100  $\mu$ M Na<sub>2</sub>S (right  
784 panel). (B) Densitometric quantitation of DosS bands in (A) at 60 min (n=3). (C) Representative  
785 autoradiogram of PAGE-resolved recombinant DosS and DosR following phosphorylation of DosR  
786 by  $\gamma$ -<sup>32</sup>P-labeled DosS alone (left and center panels) or with  $\gamma$ -<sup>32</sup>P-labeled DosS in the presence of  
787 100  $\mu$ M Na<sub>2</sub>S (right panel). These reactions were performed by adding  $\gamma$ -<sup>32</sup>P-labeled ATP to a  
788 reaction containing both DosS and DosR and analyzed at different time points. (D) Densitometric  
789 quantitation of DosR bands in (C) at 60 min (n=3). Data in (B) and (D) are shown as the mean  $\pm$   
790 SEM and were analyzed using one-way ANOVA with Tukey's multiple comparisons test performed  
791 using GraphPad Prism version 9. \*\*P < 0.01. Autoradiograms are representative of at least 3  
792 independent assays.

793

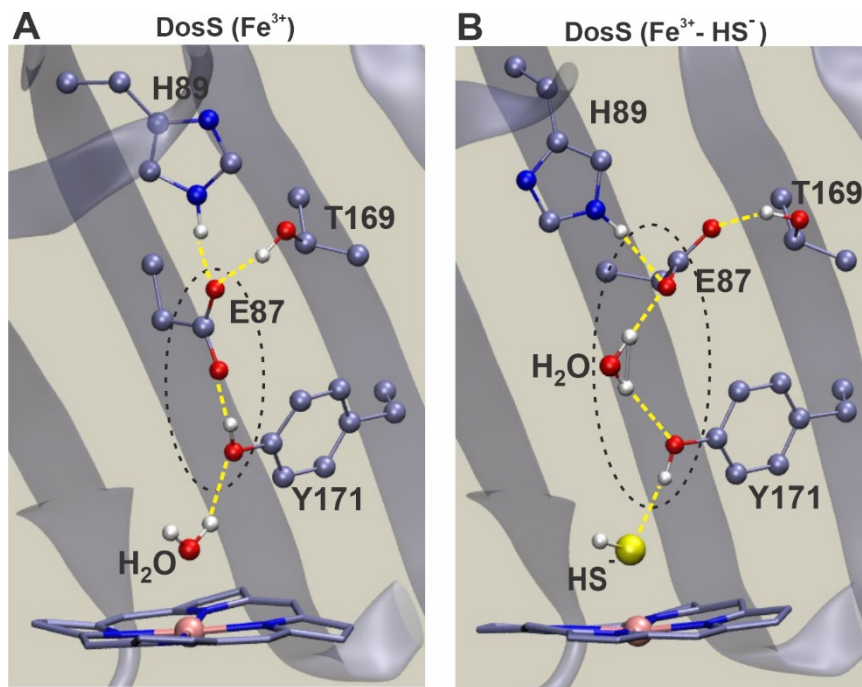

794

795 **Fig. 5. Sulfide binding alters the hydrogen bonding network in the DosS heme pocket (A)**

796 Hydrogen bonding network in the distal domain of ferric (Fe<sup>3+</sup>) DosS showing an intact H-bond

797 between glutamate (E87) and tyrosine (Y171). (B) MD-modeled hydrogen bonding network in the

798 distal domain of ferric (Fe<sup>3+</sup>) DosS in the presence of sulfide showing disrupted H-bonding between

799 glutamate (E87) and tyrosine (Y171). Predicted changes in the H-bonding patterns may lead to

800 structural changes which alter DosS kinase activity upon sulfide binding.

801

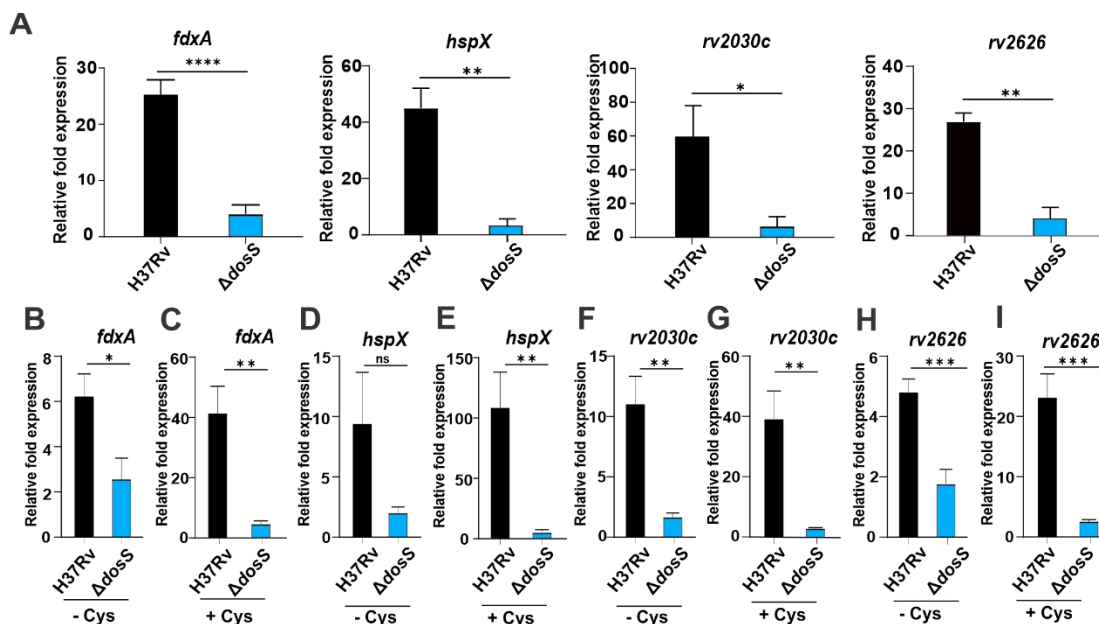

802

803 **Fig. 6. Effect of H<sub>2</sub>S on expression of DosR regulon genes.** (A) Expression of representative  
 804 Dos regulon genes in WT and  $\Delta$ dosS *Mtb* cells exposed to 50  $\mu$ M Na<sub>2</sub>S for 30 mins, relative to  
 805 unexposed *Mtb* cells (n=6, 3 independent experiments with qRT-PCR performed in duplicate). (B-  
 806 I) Expression of representative Dos regulon genes in WT and  $\Delta$ dosS *Mtb* isolated from infected  
 807 RAW 264.7 macrophages grown with or without 0.2 mM L-cysteine for 24 hours (n=6, 3  
 808 independent experiments with qRT-PCR performed in duplicate). RT-qPCR gene expression data  
 809 from macrophage-isolated *Mtb* are shown relative to gene expression in WT and  $\Delta$ dosS *Mtb*  
 810 cultures exposed to DMEM. Data are shown as the mean  $\pm$  SEM and were analyzed using a  
 811 unpaired t-test performed using GraphPad Prism version 9. \*q < 0.05, \*\*q < 0.01, \*\*\*q < 0.001 and  
 812 \*\*\*\*q < 0.0001.

813

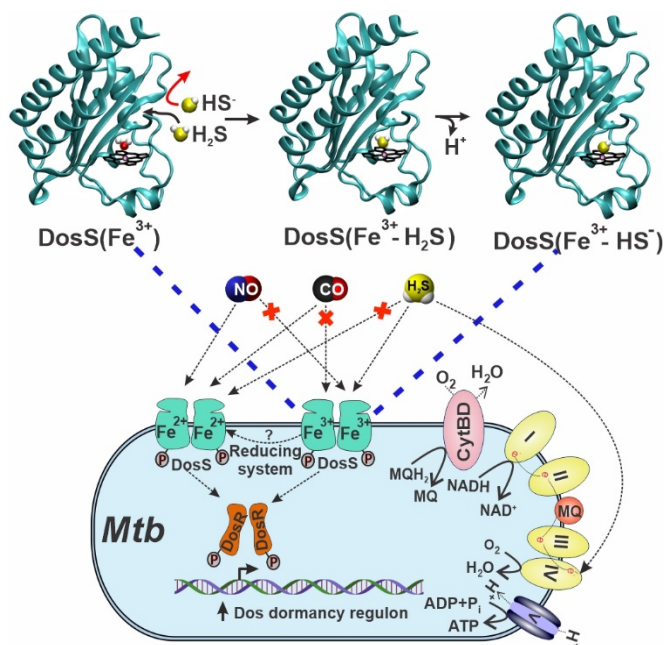

814

815 **Fig. 7. Schematic of a proposed mechanism of H<sub>2</sub>S sensing by *Mtb*.** H<sub>2</sub>S, and not HS<sup>-</sup> (red  
816 arrow), can enter the DosS heme pocket. Upon entering the heme pocket, H<sub>2</sub>S binds to DosS only  
817 in the ferric (Fe<sup>3+</sup>) state, demonstrating that sulfide sensing is different than for NO and CO, which  
818 require ferrous (Fe<sup>2+</sup>) DosS. Similar to NO and CO, binding of H<sub>2</sub>S to DosS increases autokinase  
819 activity which ultimately leads to increased expression of Dos dormancy regulon genes.

820

821 **Table 1: Comparison of Biophysical Parameters of Sulfide-Binding Proteins**

| Protein                                                        | UV-vis (nm)       | EPR (g-values)                              | K <sub>D</sub> (μM)                                                                   | Reference |
|----------------------------------------------------------------|-------------------|---------------------------------------------|---------------------------------------------------------------------------------------|-----------|
| <i>Mtb</i> DosS                                                | 415, 535, 570 (s) | 2.67, 2.26, 1.76                            | 5.64 (H <sub>2</sub> S)                                                               | This work |
| <i>L. pectinata</i> Hb I                                       | 425, 545, 573 (s) | 2.67, 2.24, 1.84                            | 0.09 (X <sub>ST</sub> )                                                               | (1)       |
| Human Hemoglobin                                               | 423, 577, 541     | 2.51, 2.25, 1.86                            | 17 (X <sub>ST</sub> )                                                                 | (2)       |
| Bovine Hemoglobin                                              | 425, 542, 575(s)  | 2.55, 2.26, 1.88                            | 7(X <sub>ST</sub> )                                                                   | (3)       |
| Equine Myoglobin                                               | 427, 547, 580     | 2.56, 2.25, 1.83                            | 96 (X <sub>ST</sub> )                                                                 | (4), (5)  |
| Human Myeloperoxidase                                          | 432, 625          | 2.567, 2.274, 1.850;<br>2.512, 2.262, 1.875 | < 12 (X <sub>ST</sub> )                                                               | (6)       |
| Microperoxidase                                                | 414, 536, 568     | --                                          | 219 (calc) (X <sub>ST</sub> )                                                         | (7)       |
| Truncated <i>B. subtilis</i> Hb                                | 427, 550, 577     | --                                          | 0.2 (X <sub>ST</sub> )                                                                | (8)       |
| Truncated <i>T. fusca</i> Hb                                   | 425, 550, 575     | --                                          | 0.36 (X <sub>ST</sub> )                                                               | (8)       |
| <i>E. coli</i> DOS (heme-regulated TCS PDE)                    | 427,546, 579      | --                                          | ca. 200 (X <sub>ST</sub> ) (based on PDE activation)                                  | (9)       |
| <i>Anaeromyxobacter</i> AfGcHK (heme-regulated TCS His kinase) | 423-426,549-551   | --                                          | 200-5000 (X <sub>ST</sub> ) for binding, although no autokinase activation with 10 mM | (10)      |

822

823 Note: Hemeproteins that get reduced on sulfide binding do not show the EPR spectrum and  
824 hence were not used for comparison eg., cytochrome c oxidase, neuroglobin, cytochrome c.

825 H<sub>2</sub>S = based on H<sub>2</sub>S concentration

826 X<sub>ST</sub> = based on concentration of total sulfide species (H<sub>2</sub>S + HS<sup>-</sup> + S<sup>2-</sup>)

827 TCS = two-component system

828 (s) = shoulder

829 calc = calculated

830

831 **Table 2. Comparison of structural and electronic parameters of H<sub>2</sub>S and HS<sup>-</sup> bound**  
832 **states obtained from QM/MM calculations**

| Parameter                                               | H <sub>2</sub> S     | HS <sup>-</sup> |
|---------------------------------------------------------|----------------------|-----------------|
| dFe-S                                                   | 2.35 Å               | 2.17 Å          |
| H <sub>2</sub> S or HS <sup>-</sup> Mulliken population | 0.5543               | 0.0984          |
| dFe-NHis                                                | 2.06 Å               | 2.09 Å          |
| dS-H1                                                   | towards Tyr 1.36 Å   | 1.35 Å          |
| dS-H2                                                   | towards water 1.39 Å |                 |
| H1 Mulliken population                                  | towards Tyr 0.2242   | S-H 0.1698      |
| H2 Mulliken population                                  | towards water 0.2644 | Tyr-H 0.4458    |

833
